# Supplementary material for: Hydrotalcite-supported Pd–Au nanocatalysts for Ullmann homocoupling reactions at low temperature
Source: Royal Society of Chemistry journal article supplement (doi:10.1039/c6nj03541h), 2017-01-01
Supplement: c6nj03541h1.pdf [file c6nj03541h1.pdf]

*Electronic Supplementary Material (ESI) for New Journal of Chemistry*

## **Hydrotalcite-supported Pd-Au nanocatalysts for Ullmann homocoupling reactions at low-temperature**

Jiang Wang<sup>a</sup>, Aiju Xu<sup>a</sup>, Meilin Jia<sup>a</sup>, Sagala Bai<sup>a</sup>, Xiaodan Cheng<sup>a</sup>, Bao Zhaorigetu<sup>\*a</sup>

<sup>a</sup> College of Chemistry and Environmental Science, Inner Mongolia Key Laboratory of Green Catalysis, Inner Mongolia Normal University, Hohhot, 010022, China, E-mail: zrgt@imnu.edu.cn.

**Figure S1** Reusability of Pd-Au<sub>3</sub>/HT for Ullmann homocoupling of bromobenzene

Reaction conditions: 0.4 mmol bromobenzene, 10 mL isopropyl alcohol, 0.8 mmol KOH, 35 mg catalyst,  $T = 40 \pm 1^\circ\text{C}$ .

The AAS results of Pd-Au<sub>3</sub>/HT after being repeated four times: Pd 0.49 wt%, Au 2.90 wt%, Au:Pd molar ratio=3.20:1

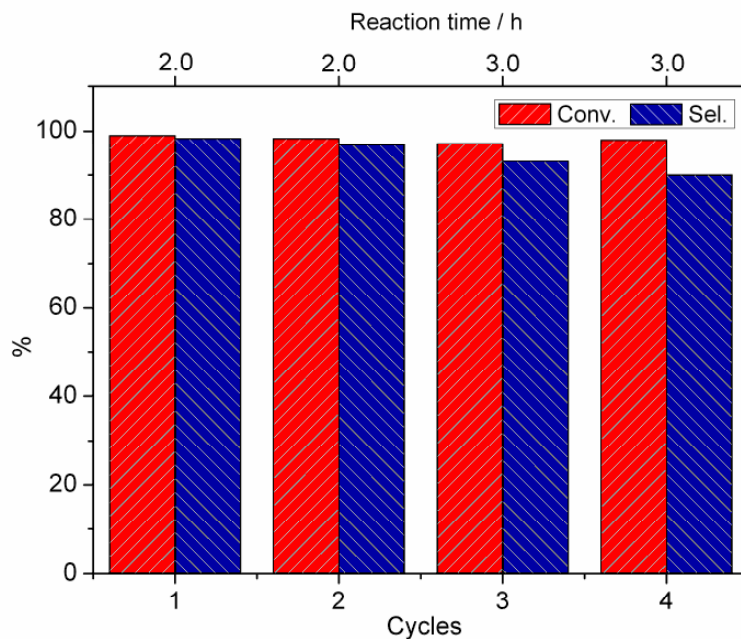

**Figure S2** TEM image and the particle size distribution of Pd-Au<sub>3</sub>/HT after being repeated four times

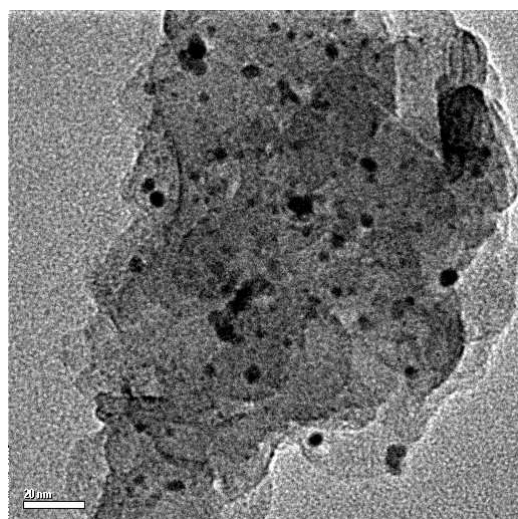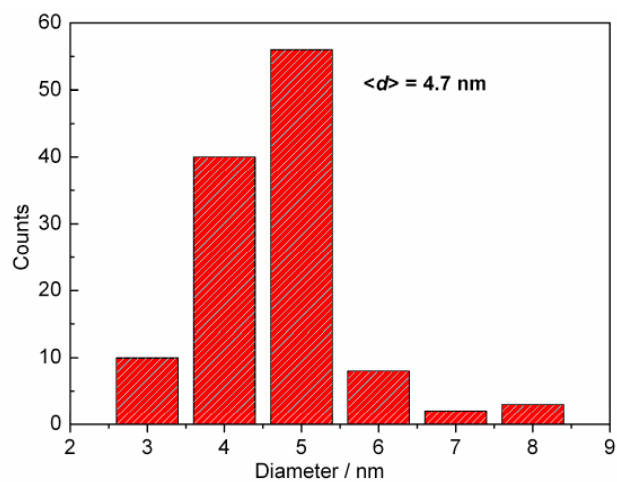

**Figure S3** EDX spectrum of Pd-Au<sub>3</sub>/HT.

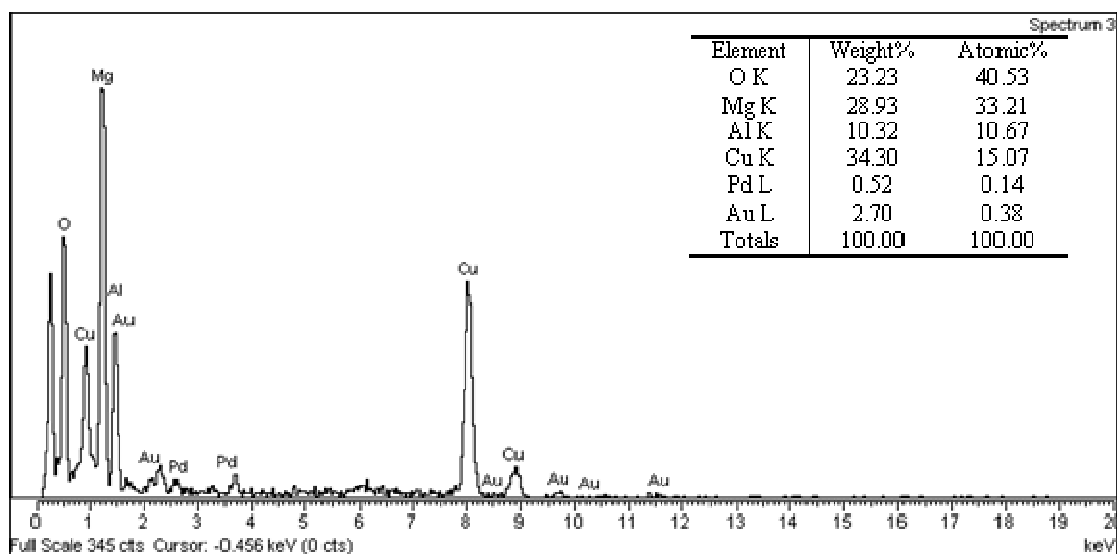

**The AAS results of Pd-Au<sub>3</sub>/HT: Pd 0.51 wt%, Au 2.81 wt%, Au:Pd molar ratio=2.96:1**

**Figure S4** XRD patterns of the catalysts. (a) HT, (b) Pd-Au<sub>3</sub>/HT, (c) Pd-Au<sub>0.5</sub>/HT, (d) Au/HT, (e) Pd/HT.

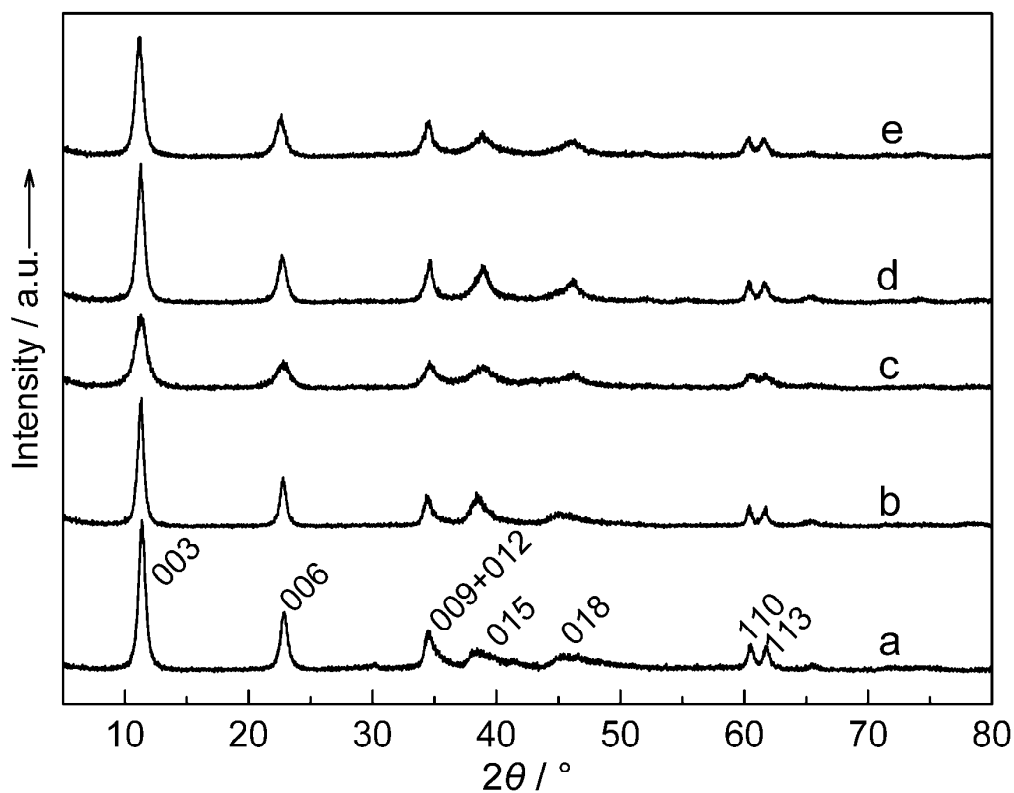

**Figure S5** UV-Vis absorption spectra of (a) HT, (b) Au/HT, (c) Pd-Au<sub>3</sub>/HT, (d) Pd-Au<sub>0.5</sub>/HT, (e) Pd/HT.

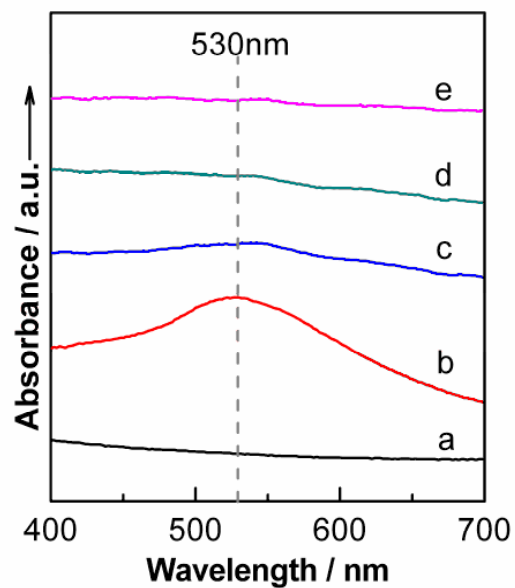

**Figure S6** The relationship between conversion of bromobenzene and amount of KOH. ( Reaction conditions: 0.4 mmol bromobenzene, 10 mL isopropyl alcohol, 35 mg Pd-Au<sub>3</sub>/HT, 2 h reaction time and  $T=40\pm 1$  °C)

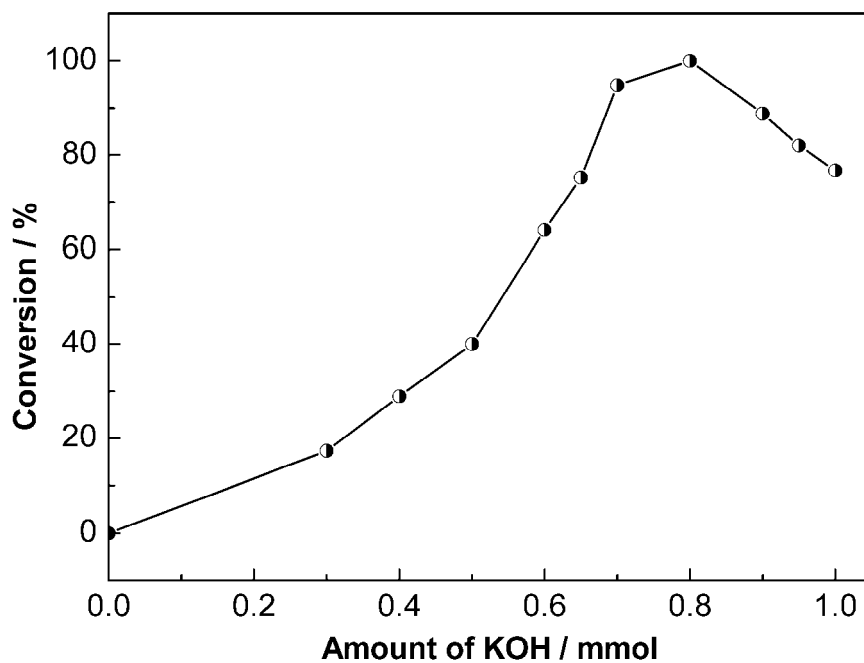

**Table S1** Lattice parameters by determined from XRD data of the catalysts.

| Catalyst                 | $d_{003}$ (nm) | $d_{110}$ (nm) | $a$ (nm) <sup>a</sup> | $c$ (nm) <sup>a</sup> |
|--------------------------|----------------|----------------|-----------------------|-----------------------|
| HT                       | 0.777          | 0.153          | 0.306                 | 2.331                 |
| Pd-Au <sub>3</sub> /HT   | 0.774          | 0.153          | 0.306                 | 2.322                 |
| Pd-Au <sub>0.5</sub> /HT | 0.775          | 0.153          | 0.306                 | 2.325                 |
| Au/HT                    | 0.776          | 0.153          | 0.306                 | 2.328                 |
| Pd/HT                    | 0.776          | 0.153          | 0.306                 | 2.328                 |

<sup>a</sup>  $a$  ( $a = 2d_{110}$ ) and  $c$  ( $c = 3d_{003}$ ).

**Table S2** Ullmann homocoupling of bromobenzene with different base<sup>a</sup>.

| Entry | Base (0.8mmol)                      | Time (h) | Conv. (%) | Yield (%) |
|-------|-------------------------------------|----------|-----------|-----------|
| 1     | KOH                                 | 10       | >99       | 81.2      |
| 2     | CH <sub>3</sub> CH <sub>2</sub> ONa | 10       | 63.5      | 44.5      |
| 3     | K <sub>2</sub> CO <sub>3</sub>      | 10       | 2.1       | 1.7       |
| 4     | NaOAc                               | 10       | Trace     | Trace     |

<sup>a</sup> Reaction conditions: 0.4 mmol bromobenzene, 10 mL isopropyl alcohol, 35 mg Pd-Au<sub>0.5</sub>/HT and  $T=40 \pm 1^\circ\text{C}$ .

**Scheme S1. Quantitative detection of acetone**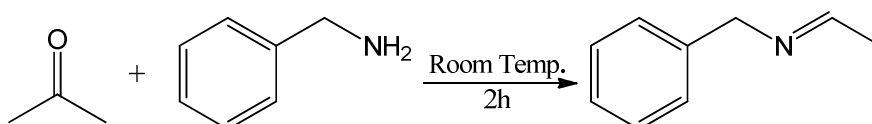

The GC peak of acetone is overlapped with that of isopropyl alcohol. We use the nucleophilic addition of acetone with benzyl amine to detect quantitatively the amount of imine as shown in Scheme S1. The results are shown that the mole ratio of the producing acetone and reactive bromobenzene approaches to 1:1.
